# Supplementary material for: Activation of RARα induces autophagy in SKBR3 breast cancer cells and depletion of key autophagy genes enhances ATRA toxicity
Source: PubMed Central journal article supplement (PMC4558517; doi:10.1038/cddis.2015.236), 2015-08-27

# Supplementary figure 2

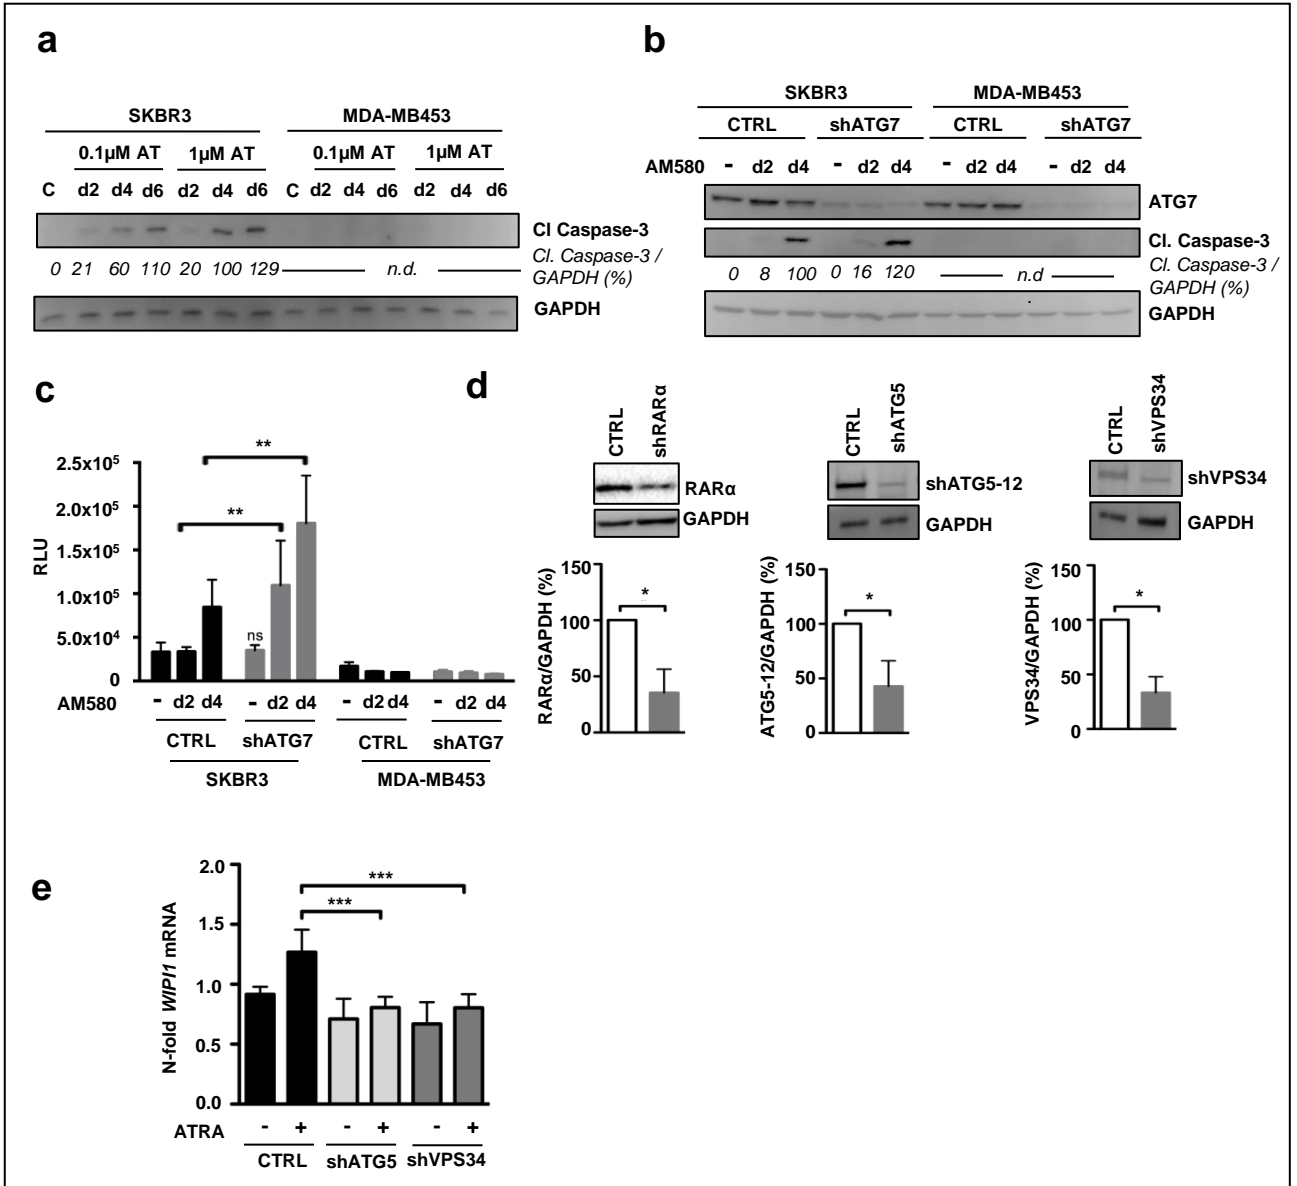

Supplement: cddis2015236x2.pdf [file cddis2015236x2.pdf]
